# Supplementary material for: Antimicrobial activity of Tachyplesin 1 against Burkholderia pseudomallei: an in vitro and in silico approach
Source: PeerJ. 2016 Oct 25;4:e2468. doi: 10.7717/peerj.2468 (PMC5088614; doi:10.7717/peerj.2468)
Supplement: Supplemental Information 2 [file peerj-04-2468-s002.xlsx]

## Sheet: Figure 1
Data for figure 1: Time kill assay
The values at each concentration are the average of three technical replicates
Time (Hour)	K96243 Untreated			TP1 55 µM			TP1 110 µM			TP1 221 µM			CAZ 54 µM
0	5.61513	5.62896	5.63904	5.61513	5.62896	5.63904	5.61513	5.62896	5.63904	5.61513	5.62896	5.63904	5.61513	5.62896	5.63904
2	5.91263	6.82173	7.85126	6.00907	6.77654	7.84441	5.7626	5.80919	7.84094	0	0	0	5.81291	5.95371	6.95957
4	7.09264	8.00813	8.78374	6.98925	7.80542	8.09342	5.14475	5.06612	5.78295	0	0	0	4.04835	4.65748	5.88586
8	9.05563	9.19064	9.04792	9.01143	8.87053	9.26587	0	0	0	0	0	0	0	0	0
12	9.7279	10.0996	9.95904	9.17124	9.21484	9.65748	0	0	0	0	0	0	0	0	0
16	9.92714	10.1173	10.1083	9.28129	9.21041	9.80087	0	0	0	0	0	0	0	0	0
20	10.1543	10.2122	10.7411	9.91733	9.66693	9.8318	0	0	0	0	0	0	0	0	0
24	10.1176	10.2935	10.1038	10.0396	9.83109	9.99903	0	0	0	0	0	0	0	0	0
*values in columns vertically are in log CFU/ml
1 way Anova Report by graphpad
Table Analyzed	Data 1
One-way analysis of variance
P value	< 0.0001
P value summary	****
Are means signif. different? (P < 0.05)	Yes
Number of groups	6
F	24.59
R square	0.7453
Bartlett's test for equal variances
Bartlett's statistic (corrected)	5.471
P value	0.3611
P value summary	ns
Do the variances differ signif. (P < 0.05)	No
ANOVA Table	SS	df	MS
Treatment (between columns)	617.4	5	123.5
Residual (within columns)	211	42	5.023
Total	828.4	47
Dunnett's Multiple Comparison Test	Mean Diff.	q	Significant? P < 0.05?	Summary	95% CI of diff
K96243 (Untreated) vs 55 mM	0.2933	0.2617	No	ns	-2.637 to 3.223
K96243 (Untreated) vs 110 mM	6.58	5.872	Yes	***	3.650 to 9.510
K96243 (Untreated) vs 221mM	8.055	7.188	Yes	***	5.125 to 10.99
K96243 (Untreated) vs CAZ (54 mM)	6.667	5.95	Yes	***	3.737 to 9.597
K96243 (Untreated) vs E. coli (Untreated)	-0.2943	0.2626	No	ns	-3.224 to 2.636

## Sheet: Figure 2
Data for figure 2
The values at each concentration are the average of three technical replicates
Untreated	Tachyplesin 1	1037	1018	DJK 5	LL37	Protegrin 1	Magainin 2	Sushi 1	Sushi 2	CAZ	MRP
7.77815	4	7.60206	7.77815	7.8451	7.69897	1.2353	7.69897	7.8451	7.77815	0	0
7.90309	4.60206	7.47712	7	7.90309	7.30103	1.02563	7.47712	7.69897	7.77815	0	0
7.8451	4	7.8451	6.95424	7.95424	7.47712	1.03654	7.60206	7.8451	7.8451	0	0
1 way Anova Report by graphpad
Table Analyzed	Data 1
One-way analysis of variance
P value	< 0.0001
P value summary	****
Are means signif. different? (P < 0.05)	Yes
Number of groups	12
F	864.3
R square	0.9975
ANOVA Table	SS	df	MS
Treatment (between columns)	357.9	11	32.54
Residual (within columns)	0.9036	24	0.03765
Total	358.9	35
Dunnett's Multiple Comparison Test	Mean Diff.	q	Significant? P < 0.05?	Summary	95% CI of diff
Untreated vs Tachyplesin 1	3.641	22.98	Yes	***	3.171 to 4.112
Untreated vs 1037	0.2007	1.267	No	ns	-0.2695 to 0.6709
Untreated vs 1018	0.598	3.774	Yes	**	0.1278 to 1.068
Untreated vs DJK 5	-0.0587	0.3705	No	ns	-0.5289 to 0.4115
Untreated vs LL37	0.3497	2.208	No	ns	-0.1205 to 0.8199
Untreated vs Protegrin 1	6.743	42.56	Yes	***	6.273 to 7.213
Untreated vs Magainin 2	0.2494	1.574	No	ns	-0.2208 to 0.7196
Untreated vs Sushi 1	0.04572	0.2886	No	ns	-0.4245 to 0.5159
Untreated vs Sushi 2	0.04165	0.2629	No	ns	-0.4285 to 0.5118
Untreated vs CAZ	7.842	49.5	Yes	***	7.372 to 8.312
Untreated vs MRP	7.842	49.5	Yes	***	7.372 to 8.312

## Sheet: Figure 3
Data for figure 4
The values at each concentration are the average of three technical replicates
Concentration in µM	0			55			110			221			442			883
Log cfu/ml	7.77815	7.90309	7.8451	6.30103	6.47712	6.36173	5.69897	5.77815	5.90309	5.60206	5.60206	5.69897	4	4.30103	4	3.8451	3.95424	3.90309
1 way Anova Report by graphpad
Table Analyzed	Data 1
One-way analysis of variance
P value	< 0.0001
P value summary	****
Are means signif. different? (P < 0.05)	Yes
Number of groups	8
F	878.6
R square	0.9974
ANOVA Table	SS	df	MS
Treatment (between columns)	49.17	7	7.024
Residual (within columns)	0.1279	16	0.007995
Total	49.3	23
Dunnett's Multiple Comparison Test	Mean Diff.	q	Significant? P < 0.05?	Summary	95% CI of diff
0 vs 55	1.462	20.03	Yes	***	1.249 to 1.676
0 vs 110	2.049	28.06	Yes	***	1.835 to 2.262
0 vs 221	2.208	30.24	Yes	***	1.994 to 2.421
0 vs 442	3.742	51.25	Yes	***	3.528 to 3.955
0 vs 883	3.941	53.98	Yes	***	3.728 to 4.155
Bonferroni's Multiple Comparison Test	Mean Diff.	t	Significant? P < 0.05?	Summary	95% CI of diff
0 vs 55	1.462	20.03	Yes	****	1.189 to 1.735
0 vs 110	2.049	28.06	Yes	****	1.776 to 2.322
0 vs 221	2.208	30.24	Yes	****	1.935 to 2.481
0 vs 442	3.742	51.25	Yes	****	3.469 to 4.015
0 vs 883	3.941	53.98	Yes	****	3.668 to 4.214
0 vs 1766	4.116	56.37	Yes	****	3.843 to 4.389
0 vs 2649	4.208	57.63	Yes	****	3.935 to 4.481
55 vs 110	0.5866	8.034	Yes	****	0.3135 to 0.8596
55 vs 221	0.7456	10.21	Yes	****	0.4726 to 1.019
55 vs 442	2.28	31.22	Yes	****	2.007 to 2.553
55 vs 883	2.479	33.96	Yes	****	2.206 to 2.752
55 vs 1766	2.654	36.35	Yes	****	2.381 to 2.927
55 vs 2649	2.746	37.61	Yes	****	2.473 to 3.019
110 vs 221	0.159	2.178	No	ns	-0.1140 to 0.4321
110 vs 442	1.693	23.19	Yes	****	1.420 to 1.966
110 vs 883	1.893	25.92	Yes	****	1.620 to 2.166
110 vs 1766	2.067	28.31	Yes	****	1.794 to 2.340
110 vs 2649	2.159	29.57	Yes	****	1.886 to 2.432
221 vs 442	1.534	21.01	Yes	****	1.261 to 1.807
221 vs 883	1.734	23.74	Yes	****	1.461 to 2.007
221 vs 1766	1.908	26.13	Yes	****	1.635 to 2.181
221 vs 2649	2	27.39	Yes	****	1.727 to 2.273
442 vs 883	0.1995	2.733	No	ns	-0.07351 to 0.4726
442 vs 1766	0.3739	5.122	Yes	**	0.1009 to 0.6470
442 vs 2649	0.466	6.383	Yes	***	0.1929 to 0.7390
883 vs 1766	0.1744	2.389	No	ns	-0.09862 to 0.4475
883 vs 2649	0.2664	3.65	No	ns	-0.006594 to 0.5395
1766 vs 2649	0.09203	1.261	No	ns	-0.1810 to 0.3651

## Sheet: Figure 5
Data for figure 6
The values at each concentration are the average of three technical replicates
Concentration in µM	0			6			12.5			25			50			100			200			MRP			CAZ			PG1
Cell Line (A 549)	100	100	100	95.1548	86.1724	95.1297	78.5925	86.2954	99.6475	81.5161	76.9805	98.7539	82.6074	67.871	84.1621	70.7478	37.7401	63.114	19.1677	14.2763	13.4788	99.6154	77.1348	92.7954	95.4197	78.6471	94.0188	2.80594	1.99107	5.2955
HEPG2	100	100	100	99.8078	87.14	95.4323	97.1674	92.4996	91.0031	96.6277	94.1523	85.1717	93.7393	88.6203	71.1309	69.8105	58.1414	45.109	10.3546	5.29148	9.48829	94.3355	78.8066	70.8822	78.2986	69.6348	76.6914	5.02723	2.13111	7.76802
AGS	100	100	100	76.4699	91.6971	87.4153	90.0232	97.7407	85.0579	86.5027	98.942	87.2349	69.1917	92.2874	81.934	72.3848	87.1043	81.2515	55.339	51.0009	44.207	96.1959	99.5704	86.9082	93.9493	96.6137	93.4108	1.24992	5.44479	3.03717
1 way Anova Report by graphpad
Number of groups	11
F	36.71
R square	0.9435
ANOVA Table	SS	df	MS
Treatment (between columns)	29415	10	2941
Residual (within columns)	1763	22	80.13
Total	31178	32
Dunnett's Multiple Comparison Test	Mean Diff.	q	Significant? P < 0.05?	Summary	95% CI of diff
0 vs 6	9.509	1.301	No	ns	-12.12 to 31.14
0 vs 12.5	9.108	1.246	No	ns	-12.52 to 30.74
0 vs 25	10.46	1.431	No	ns	-11.17 to 32.09
0 vs 50	18.72	2.561	No	ns	-2.913 to 40.35
0 vs 100	34.96	4.783	Yes	***	13.33 to 56.59
0 vs 200	75.27	10.3	Yes	***	53.64 to 96.90
0 vs MRP	11.53	1.577	No	ns	-10.10 to 33.16
0 vs CAZ	13.7	1.875	No	ns	-7.928 to 35.33
0 vs PG1	96.14	13.15	Yes	***	74.51 to 117.8
Lower concentration 2.7-22.3 uM
	0			6			12.5			25			50
A549	95.1548	86.1724	95.1297	78.5925	86.2954	99.6475	81.5161	76.9805	98.7539	82.6074	67.871	84.1621	86.0736	9.61062
HEPG2	99.8078	87.14	95.4323	97.1674	92.4996	91.0031	96.6277	94.1523	85.1717	93.7393	88.6203	71.1309	91.041	7.60331
AGS	76.4699	91.6971	87.4153	90.0232	97.7407	85.0579	86.5027	98.942	87.2349	69.1917	92.2874	81.934	87.0414	8.39395

## Sheet: Raw data for Figure 1
Raw Data for Fig 1
Replicate 1									Replicate 2										Replicate 3									Average of 3 Triplicates													Final Data Table (including E. coli)
Sample	BP K96243								Sample	BP K96243									Sample	BP K96243								Sample	BP K96243					(Log values)
																																									TIme (Hour)	K96243 (Untreated)			55 mM			110 mM
Time point	Dilution	Colonies counted	Colonies counted2	Colonies counted3	Average	CFU/ml	Average CFU/ml		Time point	Dilution	Colonies counted	Colonies counted2	Colonies counted3	Average	CFU/ml	Average CFU/ml			Time point	Dilution	Colonies counted	Colonies counted2	Colonies counted3	Average	CFU/ml	Average CFU/ml		Time Point	R1	R2	R3	Average		Time Point	R1	R2	R3	Average	SDEV		0	5.61513	5.62896	5.63904	5.61513	5.62896	5.63904	5.61513	5.62896
0 hour	1000	30	40	58	42.6667	426667	412222		0 hour	1000	50	43	50	47.6667	476667	425556			0 hour	1000	30	42	40	37.3333	373333	435556		0 hours	412222	425556	435556	424444		0 hours	5.61513	5.62896	5.63904	5.62782	0.0120047		2	5.91263	6.82173	7.85126	6.00907	6.77654	7.84441	5.7626	5.80919
	1000	44	33	40	39	390000				1000	54	35	43	44	440000					1000	35	57	63	51.6667	516667			2 hours	817778	6.63333e+06	71000000	2.61504e+07		2 hours	5.91264	6.82173	7.85126	7.41748	0.969935		4	7.09264	8.00813	8.78374	6.98925	7.80542	8.09342	5.14475	5.06612
	1000	38	46	42	42	420000				1000	40	38	30	36	360000					1000	52	32	41	41.6667	416667			4 hours	1.23778e+07	1.01889e+08	6.07778e+08	2.40681e+08		4 hours	7.09264	8.00813	8.78374	8.38144	0.846515		8	9.05563	9.19064	9.04792	9.01143	8.87053	9.26587	0	0
2 hours	1000	63	79	80	74	740000	817778		2 hours	10000	73	65	61	66.3333	6.63333e+06	6.63333e+06			2 hours	100000	85	60	82	75.6667	7.56667e+07	71000000		8 hours	1.13667e+09	1.55111e+09	1.11667e+09	1.26815e+09		8 hours	9.05563	9.19064	9.04792	9.10317	0.0802661		12	9.7279	10.0996	9.95904	9.17124	9.21484	9.65748	0	0
	1000	82	80	70	77.3333	773333				10000	68	79	70	72.3333	7.23333e+06					100000	56	71	80	69	69000000			12 hours	5.34444e+09	1.25778e+10	9100000000	9.00741e+09		12 hours	9.7279	10.0996	9.95904	9.9546	0.187681		16	9.92714	10.1173	10.1083	9.28129	9.21041	9.80087	0	0
	1000	89	93	100	94	940000				10000	75	66	40	60.3333	6.03333e+06					100000	66	69	70	68.3333	6.83333e+07			16 hours	8.45556e+09	13100000000	1.28333e+10	1.1463e+10		16 hours	9.92714	10.1173	10.1083	10.0593	0.107286		20	10.1543	10.2122	10.7411	9.91733	9.66693	9.8318	0	0
4 hours	10000	117	102	108	109	10900000	1.23778e+07		4 hours	100000	89	92	80	87	87000000	1.01889e+08			4 hours	1000000	51	59	63	57.6667	5.76667e+08	6.07778e+08		20 hours	1.42667e+10	16300000000	5.50889e+10	2.85519e+10		20 hours	10.1543	10.2122	10.7411	10.4556	0.323348		24	10.1176	10.2935	10.1038	10.0396	9.83109	9.99903	0	0
	10000	120	115	130	121.667	1.21667e+07				100000	97	107	109	104.333	1.04333e+08					1000000	31	73	65	56.3333	5.63333e+08			24 hours	1.31111e+10	1.96556e+10	12700000000	1.51556e+10		24 hours	10.1176	10.2935	10.1038	10.1806	0.105745
	10000	125	103	194	140.667	1.40667e+07				100000	110	113	120	114.333	1.14333e+08					1000000	64	67	74	68.3333	6.83333e+08
6 hours	1000000	30	54	60	48	480000000	4.73333e+08		6 hours	1000000	37	39	42	39.3333	3.93333e+08	5.47778e+08			6 hours									Sample	TP1 55.2 µM					(Log values)
	1000000	72	32	35	46.3333	4.63333e+08				1000000	63	70	73	68.6667	6.86667e+08
	1000000	43	49	51	47.6667	4.76667e+08				1000000	49	64	56	56.3333	5.63333e+08													Time Point	R1	R2	R3	Average		Time Point	R1	R2	R3	Average	SDEV
8 hours	1000000	104	131	122	119	1190000000	1.13667e+09		8 hours	1000000	127	139	144	136.667	1.36667e+09	1.55111e+09			8 hours	1000000	101	117	90	102.667	1.02667e+09	1.11667e+09		0 hours	412222	425556	435556	424444		0 hours	5.61513	5.62896	5.63904	5.62782	0.0120047
	1000000	109	102	97	102.667	1.02667e+09				1000000	157	181	179	172.333	1.72333e+09					1000000	83	116	124	107.667	1.07667e+09			2 hours	1.02111e+06	5.97778e+06	6.98889e+07	2.56293e+07		2 hours	6.00907	6.77654	7.84441	7.40874	0.921756
	1000000	111	120	127	119.333	1.19333e+09				1000000	149	161	159	156.333	1.56333e+09					1000000	123	137	114	124.667	1.24667e+09			4 hours	9.75556e+06	6.38889e+07	124000000	6.58815e+07		4 hours	6.98925	7.80543	8.09342	7.81876	0.572752
10 hours	1000000	147	161	155	154.333	1.54333e+09	1.71111e+09		10 hours	10000000	44	60	77	60.3333	6.03333e+09	6.68889e+09			10 hours									8 hours	1.02667e+09	7.42222e+08	1.84444e+09	1.20444e+09		8 hours	9.01143	8.87053	9.26587	9.08079	0.200365
	1000000	170	188	179	179	1790000000				10000000	82	70	72	74.6667	7.46667e+09													12 hours	1.48333e+09	1640000000	4.54444e+09	2.55593e+09		12 hours	9.17124	9.21484	9.65748	9.40755	0.269029
	1000000	181	193	166	180	1800000000				10000000	73	63	61	65.6667	6.56667e+09													16 hours	1.91111e+09	1.62333e+09	6.32222e+09	3.28556e+09		16 hours	9.28129	9.21041	9.80087	9.51661	0.322396
12 hours	10000000	44	48	50	47.3333	4.73333e+09	5.34444e+09		12 hours	10000000	117	123	138	126	12600000000	1.25778e+10			12 hours	10000000	93	87	78	86	8600000000	9100000000		20 hours	8.26667e+09	4.64444e+09	6.78889e+09	6.56667e+09		20 hours	9.91733	9.66693	9.8318	9.81734	0.127276
	10000000	61	45	63	56.3333	5.63333e+09				10000000	149	130	122	133.667	1.33667e+10					10000000	107	73	114	98	9800000000			24 hours	1.09556e+10	6.77778e+09	9.97778e+09	9.23704e+09		24 hours	10.0396	9.83109	9.99903	9.96553	0.110564
	10000000	65	54	51	56.6667	5.66667e+09				10000000	133	120	100	117.667	1.17667e+10					10000000	90	97	80	89	8900000000
16 hours	10000000	71	83	98	84	8400000000	8.45556e+09		16 hours	10000000	101	87	117	101.667	1.01667e+10	13100000000			16 hours	10000000	114	127	135	125.333	1.25333e+10	1.28333e+10
	10000000	68	81	90	79.6667	7.96667e+09				10000000	163	157	124	148	14800000000					10000000	120	133	141	131.333	1.31333e+10			Sample	TP1 110 µM					(Log values)
	10000000	79	92	99	90	9000000000				10000000	136	144	150	143.333	1.43333e+10					10000000	138	110	137	128.333	1.28333e+10
20 hours	10000000	113	119	130	120.667	1.20667e+10	1.42667e+10		20 hours	10000000	125	168	154	149	14900000000	16300000000			20 hours	10000000	51	62	55	56	5600000000	5.50889e+10		Time Point	R1	R2	R3	Average		Time Point	R1	R2	R3	Average	SDEV
	10000000	143	130	151	141.333	1.41333e+10				10000000	179	181	188	182.667	1.82667e+10					100000000	87	80	73	80	80000000000			0 hours	412222	425556	435556	424444		0 hours	5.61513	5.62896	5.63904	5.62782	0.0120047
	10000000	152	168	178	166	16600000000				10000000	167	155	150	157.333	1.57333e+10					100000000	74	75	90	79.6667	7.96667e+10			2 hours	578889	644444	6.93333e+07	2.35189e+07		2 hours	5.7626	5.80919	7.84094	7.37142	1.18671
24 hours	10000000	180	192	100	157.333	1.57333e+10	1.31111e+10		24 hours	10000000	198	187	180	188.333	1.88333e+10	1.96556e+10			24 hours	10000000	117	129	180	142	14200000000	12700000000		4 hours	139556	116444	606667	287556		4 hours	5.14475	5.06612	5.78295	5.45872	0.393135
	10000000	103	125	114	114	11400000000				10000000	199	210	220	209.667	2.09667e+10					10000000	131	104	119	118	11800000000			8 hours	0	0	0	0		8 hours	0	0	0	0	0
	10000000	121	143	102	122	12200000000				10000000	184	201	190	191.667	1.91667e+10					10000000	122	134	107	121	12100000000			12 hours	0	0	0	0		12 hours	0	0	0	0	0
																												16 hours	0	0	0	0		16 hours	0	0	0	0	0
																												20 hours	0	0	0	0		20 hours	0	0	0	0	0
																												24 hours	0	0	0	0		24 hours	0	0	0	0	0
Sample	TP1 55.2 µM								Sample	TP1 55.2 µM									Sample	TP1 55.2 µM
																												Sample	TP1 221 µM					(Log values)
Time point	Dilution	Colonies counted	Colonies counted2	Colonies counted3	Average	CFU/ml	Average CFU/ml		Time point	Dilution	Colonies counted	Colonies counted2	Colonies counted3	Average	CFU/ml	Average CFU/ml			Time point	Dilution	Colonies counted	Colonies counted2	Colonies counted3	Average	CFU/ml	Average CFU/ml
0 hour	1000	30	40	58	42.6667	426667	412222		0 hour	1000	50	43	50	47.6667	476667	425556			0 hour	1000	30	42	40	37.3333	373333	435556		Time Point	R1	R2	R3	Average		Time Point	R1	R2	R3	Average	SDEV
	1000	44	33	40	39	390000				1000	54	35	43	44	440000					1000	35	57	63	51.6667	516667			0 hours	412222	425556	435556	424444		0 hours	5.61513	5.62896	5.63904	5.62782	0.0120047
	1000	38	46	42	42	420000				1000	40	38	30	36	360000					1000	52	32	41	41.6667	416667			1 hour		495.556	713333	356914		1 hour		2.69509	5.85329	5.55256	2.23318
2 hours	1000	80	98	113	97	970000	1.02111e+06		2 hours	10000	80	74	70	74.6667	7.46667e+06	5.97778e+06			2 hours	100000	62	77	86	75	75000000	6.98889e+07		2 hours	0	0	0	0		2 hours	0	0	0	0	0
	1000	91	119	121	110.333	1.10333e+06				10000	64	53	44	53.6667	5.36667e+06					100000	61	67	78	68.6667	6.86667e+07			4 hours	0	0	0	0		4 hours	0	0	0	0	0
	1000	89	107	101	99	990000				10000	48	55	50	51	5100000					100000	56	78	64	66	66000000			8 hours	0	0	0	0		8 hours	0	0	0	0	0
4 hours	10000	90	93	100	94.3333	9.43333e+06	9.75556e+06		4 hours	100000	66	60	71	65.6667	6.56667e+07	6.38889e+07			4 hours	100000	99	118	109	108.667	1.08667e+08	124000000		12 hours	0	0	0	0		12 hours	0	0	0	0	0
	10000	103	83	84	90	9000000				100000	56	57	65	59.3333	5.93333e+07					100000	122	129	140	130.333	1.30333e+08			16 hours	0	0	0	0		16 hours	0	0	0	0	0
	10000	107	102	116	108.333	1.08333e+07				100000	60	72	68	66.6667	6.66667e+07					100000	134	145	120	133	133000000			20 hours	0	0	0	0		20 hours	0	0	0	0	0
6 hours	100000	173	161	170	168	168000000	1.84667e+08		6 hours	100000	107	113	129	116.333	1.16333e+08	1.27111e+08			6 hours	1000000	104	117	119	113.333	1.13333e+09	1.02889e+09		24 hours	0	0	0	0		24 hours	0	0	0	0	0
	100000	183	193	208	194.667	1.94667e+08				100000	131	124	120	125	125000000					1000000	80	87	94	87	870000000
	100000	171	192	211	191.333	1.91333e+08				100000	137	143	140	140	140000000					1000000	103	128	94	108.333	1.08333e+09
8 hours	1000000	81	97	111	96.3333	9.63333e+08	1.02667e+09		8 hours	1000000	63	67	79	69.6667	6.96667e+08	7.42222e+08			8 hours	1000000	167	179	161	169	1690000000	1.84444e+09
	1000000	78	102	131	103.667	1.03667e+09				1000000	83	80	75	79.3333	7.93333e+08					1000000	181	187	195	187.667	1.87667e+09			Sample	TP1 441 µM					(Log values)							One-Way ANOVA
	1000000	107	113	104	108	1080000000				1000000	74	77	70	73.6667	7.36667e+08					1000000	201	190	199	196.667	1.96667e+09
10 hours									12 hours	1000000	154	164	171	163	1630000000	1640000000			12 hours	10000000	30	45	38	37.6667	3.76667e+09	4.54444e+09		Time Point	R1	R2	R3	Average		Time Point	R1	R2	R3	Average	SDEV		Table Analyzed	Data 1
										1000000	163	166	169	166	1660000000					10000000	41	53	54	49.3333	4.93333e+09			0 hours	412222	425556	435556	424444		0 hours	5.61513	5.62896	5.63904	5.62782	0.0120047
										1000000	158	161	170	163	1630000000					10000000	45	63	40	49.3333	4.93333e+09			1 hour	0	0	0	0		1 hour	0	0	0	0	0		One-way analysis of variance
12 hours	1000000	163	151	141	151.667	1.51667e+09	1.48333e+09		16 hours	1000000	141	149	150	146.667	1.46667e+09	1.62333e+09			16 hours	10000000	50	62	57	56.3333	5.63333e+09	6.32222e+09		2 hours	0	0	0	0		2 hours	0	0	0	0	0		P value	< 0.0001
	1000000	123	137	141	133.667	1.33667e+09				1000000	132	168	190	163.333	1.63333e+09					10000000	63	67	77	69	6900000000			4 hours	0	0	0	0		4 hours	0	0	0	0	0		P value summary	****
	1000000	158	150	171	159.667	1.59667e+09				1000000	187	177	167	177	1770000000					10000000	55	68	70	64.3333	6.43333e+09			8 hours	0	0	0	0		8 hours	0	0	0	0	0		Are means signif. different? (P < 0.05)	Yes
16 hours	1000000	163	180	181	174.667	1.74667e+09	1.91111e+09		20 hours	10000000	32	40	39	37	3700000000	4.64444e+09			20 hours	10000000	83	81	70	78	7800000000	6.78889e+09		12 hours	0	0	0	0		12 hours	0	0	0	0	0		Number of groups	6
	1000000	191	201	207	199.667	1.99667e+09				10000000	40	54	56	50	5000000000					10000000	72	65	60	65.6667	6.56667e+09			16 hours	0	0	0	0		16 hours	0	0	0	0	0		F	24.59
	1000000	212	202	183	199	1990000000				10000000	62	48	47	52.3333	5.23333e+09					10000000	65	60	55	60	6000000000			20 hours	0	0	0	0		20 hours	0	0	0	0	0		R square	0.7453
20 hours	10000000	59	61	98	72.6667	7.26667e+09	8.26667e+09		24 hours	10000000	89	67	61	72.3333	7.23333e+09	6.77778e+09			24 hours	10000000	98	90	112	100	10000000000	9.97778e+09		24 hours	0	0	0	0		24 hours	0	0	0	0	0
	10000000	83	87	90	86.6667	8.66667e+09				10000000	58	66	71	65	6500000000					10000000	117	90	93	100	10000000000																Bartlett's test for equal variances
	10000000	94	82	90	88.6667	8.86667e+09				10000000	73	60	65	66	6600000000					10000000	89	98	111	99.3333	9.93333e+09																Bartlett's statistic (corrected)	5.471
24 hours	10000000	132	104	107	114.333	1.14333e+10	1.09556e+10																																		P value	0.3611
	10000000	98	102	109	103	10300000000																						Sample	CAZ 54 µM					(Log values)							P value summary	ns
	10000000	121	105	108	111.333	1.11333e+10																																			Do the variances differ signif. (P < 0.05)	No
																												Time Point	R1	R2	R3	Average		Time Point	R1	R2	R3	Average	SDEV
									Sample	TP1 110 µM									Sample	TP1 110 µM								0 hours	412222	425556	435556	424444		0 hours	5.61513	5.62896	5.63904	5.62782	0.0120047		ANOVA Table	SS	df	MS
																												1 hour		3.47778e+06	4.87778e+07	2.61278e+07		1 hour		6.5413	7.68822	7.4171	0.810995		Treatment (between columns)	617.4	5	123.5
									Time point	Dilution	Colonies counted	Colonies counted2	Colonies counted3	Average	CFU/ml	Average CFU/ml			Time point	Dilution	Colonies counted	Colonies counted2	Colonies counted3	Average	CFU/ml	Average CFU/ml		2 hours	650000	898889	9.11111e+06	3.55333e+06		2 hours	5.81291	5.95371	6.95957	6.55064	0.625355		Residual (within columns)	211	42	5.023
Sample	TP1 110 µM								0 hour	1000	50	43	50	47.6667	476667	425556			0 hour	1000	30	42	40	37.3333	373333	435556		4 hours	11177.8	45444.4	768889	275170		4 hours	4.04836	4.65748	5.88586	5.4396	0.935984		Total	828.4	47
										1000	54	35	43	44	440000					1000	35	57	63	51.6667	516667			8 hours	0	0	0	0		8 hours	0	0	0	0	0
Time point	Dilution	Colonies counted	Colonies counted2	Colonies counted3	Average	CFU/ml	Average CFU/ml			1000	40	38	30	36	360000					1000	52	32	41	41.6667	416667			12 hours	0	0	0	0		12 hours	0	0	0	0	0		Dunnett's Multiple Comparison Test	Mean Diff.	q	Significant? P < 0.05?	Summary	95% CI of diff
0 hour	1000	30	40	58	42.6667	426667	412222		2 hours	1000	83	89	95	89	890000	644444			2 hours	100000	65	76	92	77.6667	7.76667e+07	6.93333e+07		16 hours	0	0	0	0		16 hours	0	0	0	0	0		K96243 (Untreated) vs 55 mM	0.2933	0.2617	No	ns	-2.637 to 3.223
	1000	44	33	40	39	390000				1000	50	58	40	49.3333	493333					100000	53	61	65	59.6667	5.96667e+07			20 hours	0	0	0	0		20 hours	0	0	0	0	0		K96243 (Untreated) vs 110 mM	6.58	5.872	Yes	***	3.650 to 9.510
	1000	38	46	42	42	420000				1000	35	63	67	55	550000					100000	85	66	61	70.6667	7.06667e+07			24 hours	0	0	0	0		24 hours	0	0	0	0	0		K96243 (Untreated) vs 221mM	8.055	7.188	Yes	***	5.125 to 10.99
2 hours	1000	50	31	44	41.6667	416667	578889		4 hours	100	130	109	127	122	122000	116444			4 hours	1000	50	67	56	57.6667	576667	606667															K96243 (Untreated) vs CAZ (54 mM)	6.667	5.95	Yes	***	3.737 to 9.597
	1000	62	51	59	57.3333	573333				100	117	119	131	122.333	122333					1000	60	71	67	66	660000																K96243 (Untreated) vs E. coli (Untreated)	-0.2943	0.2626	No	ns	-3.224 to 2.636
	1000	70	66	88	74.6667	746667				100	123	89	103	105	105000					1000	69	56	50	58.3333	583333
4 hours	100	151	179	183	171	171000	139556		6 hours	1	102	109	98	103	1030	1444.44			6 hours	10	82	89	70	80.3333	8033.33	5588.89		Sample	E. coli					(Log values)
	100	193	150	121	154.667	154667				1	131	147	181	153	1530					10	50	53	41	48	4800
	100	87	93	99	93	93000				1	193	172	167	177.333	1773.33					10	35	43	40	39.3333	3933.33			Time Point	R1	R2	R3	Average		Time Point	R1	R2	R3	Average	SDEV
6 hours	10	104	117	127	116	11600	10022.2		8 hours	0	0	0	0	0	0	0			8 hours	0	0	0	0	0	0	0		0 hours	837778	755556	680000	757778		0 hours	5.92313	5.87827	5.83251	5.87954	0.0453107
	10	80	96	106	94	9400				0	0	0	0	0	0					0	0	0	0	0	0			2 hours	1.32778e+07	9.82222e+06	1.15222e+08	4.61074e+07		2 hours	7.12313	6.99221	8.06154	7.66377	0.583269
	10	100	90	82	90.6667	9066.67				0	0	0	0	0	0					0	0	0	0	0	0			4 hours	8.22222e+08	40000000	6.37778e+08	500000000		4 hours	8.91499	7.60206	8.80467	8.69897	0.728265
8 hours	0	0	0	0	0	0	0		10 hours	0	0	0	0	0	0	0			10 hours	0	0	0	0	0	0	0		8 hours	1.09333e+09	1.16222e+09	1.19667e+09	1.15074e+09		8 hours	9.03875	9.06529	9.07797	9.06098	0.0200139
	0	0	0	0	0	0				0	0	0	0	0	0					0	0	0	0	0	0			12 hours	1.25667e+10	1.62556e+10	6.92222e+09	1.19148e+10		12 hours	10.0992	10.211	9.84025	10.0761	0.190186
	0	0	0	0	0	0				0	0	0	0	0	0					0	0	0	0	0	0			16 hours	1.76556e+10	6.26667e+10	1.02889e+10	3.02037e+10		16 hours	10.2469	10.797	10.0124	10.4801	0.402776
10 hours	0	0	0	0	0	0	0		12 hours	0	0	0	0	0	0	0			12 hours	0	0	0	0	0	0	0		20 hours	1.68778e+10	7.98889e+10	4.05556e+10	4.57741e+10		20 hours	10.2273	10.9025	10.6081	10.6606	0.338504
	0	0	0	0	0	0				0	0	0	0	0	0					0	0	0	0	0	0			24 hours	1.58778e+10	83000000000	7.81111e+10	5.89963e+10		24 hours	10.2008	10.9191	10.8927	10.7708	0.407306
	0	0	0	0	0	0				0	0	0	0	0	0					0	0	0	0	0	0
12 hours	0	0	0	0	0	0	0		16 hours	0	0	0	0	0	0	0			16 hours	0	0	0	0	0	0	0
	0	0	0	0	0	0				0	0	0	0	0	0					0	0	0	0	0	0
	0	0	0	0	0	0				0	0	0	0	0	0					0	0	0	0	0	0
16 hours	0	0	0	0	0	0	0		20 hours	0	0	0	0	0	0	0			20 hours	0	0	0	0	0	0	0
	0	0	0	0	0	0				0	0	0	0	0	0					0	0	0	0	0	0
	0	0	0	0	0	0				0	0	0	0	0	0					0	0	0	0	0	0
20 hours	0	0	0	0	0	0	0		24 hours	0	0	0	0	0	0	0			24 hours	0	0	0	0	0	0	0
	0	0	0	0	0	0				0	0	0	0	0	0					0	0	0	0	0	0
	0	0	0	0	0	0				0	0	0	0	0	0					0	0	0	0	0	0
24 hours	0	0	0	0	0	0	0
	0	0	0	0	0	0
	0	0	0	0	0	0
									Sample	TP1 221 µM									Sample	TP1 221 µM
									Time point	Dilution	Colonies counted	Colonies counted2	Colonies counted3	Average	CFU/ml	Average CFU/ml			Time point	Dilution	Colonies counted	Colonies counted2	Colonies counted3	Average	CFU/ml	Average CFU/ml
Sample	TP1 221 µM								0 hour	1000	50	43	50	47.6667	476667	425556			0 hour	1000	30	42	40	37.3333	373333	435556
										1000	54	35	43	44	440000					1000	35	57	63	51.6667	516667
Time point	Dilution	Colonies counted	Colonies counted2	Colonies counted3	Average	CFU/ml	Average CFU/ml			1000	40	38	30	36	360000					1000	52	32	41	41.6667	416667
0 hour	1000	30	40	58	42.6667	426667	412222		1 hour	1	62	71	50	61	610	495.556			1 hour	1000	82	88	75	81.6667	816667	713333
	1000	44	33	40	39	390000				1	48	45	51	48	480					1000	60	81	65	68.6667	686667
	1000	38	46	42	42	420000				1	38	33	48	39.6667	396.667					1000	57	64	70	63.6667	636667
2 hours	10	0	0	0	0	0	0		2 hours	0	0	0	0	0	0	0			2 hours	0	0	0	0	0	0	0
	10	0	0	0	0	0				0	0	0	0	0	0					0	0	0	0	0	0
	10	0	0	0	0	0				0	0	0	0	0	0					0	0	0	0	0	0
4 hours	0	0	0	0	0	0	0		4hours	0	0	0	0	0	0	0			4 hours	0	0	0	0	0	0	0
	0	0	0	0	0	0				0	0	0	0	0	0					0	0	0	0	0	0
	0	0	0	0	0	0				0	0	0	0	0	0					0	0	0	0	0	0
6 hours	0	0	0	0	0	0	0		8 hours	0	0	0	0	0	0	0			8 hours	0	0	0	0	0	0	0
	0	0	0	0	0	0				0	0	0	0	0	0					0	0	0	0	0	0
	0	0	0	0	0	0				0	0	0	0	0	0					0	0	0	0	0	0
8 hours	0	0	0	0	0	0	0		10 hours	0	0	0	0	0	0	0			10 hours	0	0	0	0	0	0	0
	0	0	0	0	0	0				0	0	0	0	0	0					0	0	0	0	0	0
	0	0	0	0	0	0				0	0	0	0	0	0					0	0	0	0	0	0
10 hours	0	0	0	0	0	0	0		12 hours	0	0	0	0	0	0	0			12 hours	0	0	0	0	0	0	0
	0	0	0	0	0	0				0	0	0	0	0	0					0	0	0	0	0	0
	0	0	0	0	0	0				0	0	0	0	0	0					0	0	0	0	0	0
12 hours	0	0	0	0	0	0	0		16 hours	0	0	0	0	0	0	0			16 hours	0	0	0	0	0	0	0
	0	0	0	0	0	0				0	0	0	0	0	0					0	0	0	0	0	0
	0	0	0	0	0	0				0	0	0	0	0	0					0	0	0	0	0	0
16 hours	0	0	0	0	0	0	0		20 hours	0	0	0	0	0	0	0			20 hours	0	0	0	0	0	0	0
	0	0	0	0	0	0				0	0	0	0	0	0					0	0	0	0	0	0
	0	0	0	0	0	0				0	0	0	0	0	0					0	0	0	0	0	0
20 hours	0	0	0	0	0	0	0		24 hours	0	0	0	0	0	0	0			24 hours	0	0	0	0	0	0	0
	0	0	0	0	0	0				0	0	0	0	0	0					0	0	0	0	0	0
	0	0	0	0	0	0				0	0	0	0	0	0					0	0	0	0	0	0
24 hours	0	0	0	0	0	0	0
	0	0	0	0	0	0
	0	0	0	0	0	0
									Sample	TP1 441 µM									Sample	TP1 441 µM
									Time point	Dilution	Colonies counted	Colonies counted2	Colonies counted3	Average	CFU/ml	Average CFU/ml			Time point	Dilution	Colonies counted	Colonies counted2	Colonies counted3	Average	CFU/ml	Average CFU/ml
Sample	TP1 441 µM								0 hour	1000	50	43	50	47.6667	476667	425556			0 hour	1000	30	42	40	37.3333	373333	435556
										1000	54	35	43	44	440000					1000	35	57	63	51.6667	516667
Time point	Dilution	Colonies counted	Colonies counted2	Colonies counted3	Average	CFU/ml	Average CFU/ml			1000	40	38	30	36	360000					1000	52	32	41	41.6667	416667
0 hour	1000	30	40	58	42.6667	426667	412222		2 hours	0	0	0	0	0	0	0			2 hours	0	0	0	0	0	0	0
	1000	44	33	40	39	390000				0	0	0	0	0	0					0	0	0	0	0	0
	1000	38	46	42	42	420000				0	0	0	0	0	0					0	0	0	0	0	0
2 hours	1	35	59	40	44.6667	446.667	501.111		4 hours	0	0	0	0	0	0	0			4 hours	0	0	0	0	0	0	0
	1	55	63	49	55.6667	556.667				0	0	0	0	0	0					0	0	0	0	0	0
	1	41	57	52	50	500				0	0	0	0	0	0					0	0	0	0	0	0
4 hours	0	0	0	0	0	0	0		6 hours	0	0	0	0	0	0	0			6 hours	0	0	0	0	0	0	0
	0	0	0	0	0	0				0	0	0	0	0	0					0	0	0	0	0	0
	0	0	0	0	0	0				0	0	0	0	0	0					0	0	0	0	0	0
6 hours	0	0	0	0	0	0	0		8 hours	0	0	0	0	0	0	0			8 hours	0	0	0	0	0	0	0
	0	0	0	0	0	0				0	0	0	0	0	0					0	0	0	0	0	0
	0	0	0	0	0	0				0	0	0	0	0	0					0	0	0	0	0	0
8 hours	0	0	0	0	0	0	0		10 hours	0	0	0	0	0	0	0			10 hours	0	0	0	0	0	0	0
	0	0	0	0	0	0				0	0	0	0	0	0					0	0	0	0	0	0
	0	0	0	0	0	0				0	0	0	0	0	0					0	0	0	0	0	0
10 hours	0	0	0	0	0	0	0		12 hours	0	0	0	0	0	0	0			12 hours	0	0	0	0	0	0	0
	0	0	0	0	0	0				0	0	0	0	0	0					0	0	0	0	0	0
	0	0	0	0	0	0				0	0	0	0	0	0					0	0	0	0	0	0
12 hours	0	0	0	0	0	0	0		16 hours	0	0	0	0	0	0	0			16 hours	0	0	0	0	0	0	0
	0	0	0	0	0	0				0	0	0	0	0	0					0	0	0	0	0	0
	0	0	0	0	0	0				0	0	0	0	0	0					0	0	0	0	0	0
16 hours	0	0	0	0	0	0	0		20 hours	0	0	0	0	0	0	0			20 hours	0	0	0	0	0	0	0
	0	0	0	0	0	0				0	0	0	0	0	0					0	0	0	0	0	0
	0	0	0	0	0	0				0	0	0	0	0	0					0	0	0	0	0	0
20 hours	0	0	0	0	0	0	0		24 hours	0	0	0	0	0	0	0			24 hours	0	0	0	0	0	0	0
	0	0	0	0	0	0				0	0	0	0	0	0					0	0	0	0	0	0
	0	0	0	0	0	0				0	0	0	0	0	0					0	0	0	0	0	0
24 hours	0	0	0	0	0	0	0
	0	0	0	0	0	0
	0	0	0	0	0	0
									Sample	CAZ 54 µM									Sample	CAZ 54 µM
									Time point	Dilution	Colonies counted	Colonies counted2	Colonies counted3	Average	CFU/ml	Average CFU/ml			Time point	Dilution	Colonies counted	Colonies counted2	Colonies counted3	Average	CFU/ml	Average CFU/ml
Sample	CAZ 54 µM								0 hour	1000	50	43	50	47.6667	476667	425556			0 hour	1000	30	42	40	37.3333	373333	435556
										1000	54	35	43	44	440000					1000	35	57	63	51.6667	516667
Time point	Dilution	Colonies counted	Colonies counted2	Colonies counted3	Average	CFU/ml	Average CFU/ml			1000	40	38	30	36	360000					1000	52	32	41	41.6667	416667
0 hour	1000	30	40	58	42.6667	426667	412222		1 hour	10000	30	28	41	33	3300000	3.47778e+06			1 hour	100000	52	59	72	61	61000000	4.87778e+07
	1000	44	33	40	39	390000				10000	35	43	29	35.6667	3.56667e+06					100000	64	67	50	60.3333	6.03333e+07
	1000	38	46	42	42	420000				10000	40	36	31	35.6667	3.56667e+06					100000	45	30	0	25	25000000
2 hours	1000	50	60	48	52.6667	526667	650000		2 hours	1000	103	81	89	91	910000	898889			2 hours	10000	79	83	87	83	8300000	9.11111e+06
	1000	71	55	62	62.6667	626667				1000	72	87	93	84	840000					10000	80	97	83	86.6667	8.66667e+06
	1000	88	91	60	79.6667	796667				1000	93	91	100	94.6667	946667					10000	94	107	110	103.667	1.03667e+07
4 hours	10	110	99	125	111.333	11133.3	11177.8		4 hours	100	59	43	37	46.3333	46333.3	45444.4			4 hours	1000	107	65	88	86.6667	866667	768889
	10	131	109	100	113.333	11333.3				100	38	42	49	43	43000					1000	71	102	40	71	710000
	10	123	108	101	110.667	11066.7				100	53	48	40	47	47000					1000	55	81	83	73	730000
6 hours	1	50	63	40	51	510	933.333		6 hours	1	87	80	73	80	800	750			6 hours	10	32	40	61	44.3333	4433.33	1782.22
	1	100	94	98	97.3333	973.333				1	60	57	81	66	660					1	35	70	32	45.6667	456.667
	1	133	140	122	131.667	1316.67				1	85	73	79	79	790					1	48	30	59	45.6667	456.667
8 hours	0	0	0	0	0	0	0		8 hours	0	0	0	0	0	0	0			8 hours	1	0	0	0	0	0	0
	0	0	0	0	0	0				0	0	0	0	0	0					1	0	0	0	0	0
	0	0	0	0	0	0				0	0	0	0	0	0					1	0	0	0	0	0
10 hours	0	0	0	0	0	0	0		10 hours	0	0	0	0	0	0	0			10 hours	0	0	0	0	0	0	0
	0	0	0	0	0	0				0	0	0	0	0	0					0	0	0	0	0	0
	0	0	0	0	0	0				0	0	0	0	0	0					0	0	0	0	0	0
12 hours	0	0	0	0	0	0	0		12 hours	0	0	0	0	0	0	0			12 hours	0	0	0	0	0	0	0
	0	0	0	0	0	0				0	0	0	0	0	0					0	0	0	0	0	0
	0	0	0	0	0	0				0	0	0	0	0	0					0	0	0	0	0	0
16 hours	0	0	0	0	0	0	0		16 hours	0	0	0	0	0	0	0			16 hours	0	0	0	0	0	0	0
	0	0	0	0	0	0				0	0	0	0	0	0					0	0	0	0	0	0
	0	0	0	0	0	0				0	0	0	0	0	0					0	0	0	0	0	0
20 hours	0	0	0	0	0	0	0		20 hours	0	0	0	0	0	0	0			20 hours	0	0	0	0	0	0	0
	0	0	0	0	0	0				0	0	0	0	0	0					0	0	0	0	0	0
	0	0	0	0	0	0				0	0	0	0	0	0					0	0	0	0	0	0
24 hours	0	0	0	0	0	0	0		24 hours	0	0	0	0	0	0	0			24 hours	0	0	0	0	0	0	0
	0	0	0	0	0	0				0	0	0	0	0	0					0	0	0	0	0	0
	0	0	0	0	0	0				0	0	0	0	0	0					0	0	0	0	0	0
																			Sample	E. coli
																			Time point	Dilution	Colonies counted	Colonies counted2	Colonies counted3	Average	CFU/ml	Average CFU/ml
Sample	E. coli								Sample	E. coli									0 hour	1000	61	74	68	67.6667	676667	680000
																				1000	59	65	78	67.3333	673333
Time point	Dilution	Colonies counted	Colonies counted2	Colonies counted3	Average	CFU/ml	Average CFU/ml		Time point	Dilution	Colonies counted	Colonies counted2	Colonies counted3	Average	CFU/ml	Average CFU/ml				1000	80	60	67	69	690000
0 hour	1000	100	90	95	95	950000	837778		0 hour	1000	59	65	79	67.6667	676667	755556			2 hours	100000	117	101	124	114	114000000	1.15222e+08
	1000	80	72	89	80.3333	803333				1000	83	80	73	78.6667	786667					100000	122	130	143	131.667	1.31667e+08
	1000	60	85	83	76	760000				1000	85	76	80	80.3333	803333					100000	80	109	111	100	100000000
2 hours	10000	130	153	141	141.333	1.41333e+07	1.32778e+07		2 hours	10000	93	99	103	98.3333	9.83333e+06	9.82222e+06			4 hours	1000000	42	59	71	57.3333	5.73333e+08	6.37778e+08
	10000	129	134	130	131	13100000				10000	107	90	83	93.3333	9.33333e+06					1000000	73	51	48	57.3333	5.73333e+08
	10000	120	124	134	126	12600000				10000	110	104	95	103	10300000					1000000	67	83	80	76.6667	7.66667e+08
4 hours	1000000	71	74	81	75.3333	7.53333e+08	8.22222e+08		4 hours	100000	31	35	43	36.3333	3.63333e+07	40000000			8 hours	1000000	137	148	100	128.333	1.28333e+09	1.19667e+09
	1000000	75	83	91	83	830000000				100000	58	47	39	48	48000000					1000000	122	107	134	121	1210000000
	1000000	98	80	87	88.3333	8.83333e+08				100000	38	32	37	35.6667	3.56667e+07					1000000	141	98	90	109.667	1.09667e+09
8 hours	1000000	87	90	103	93.3333	9.33333e+08	1.09333e+09		8 hours	1000000	108	114	138	120	1200000000	1.16222e+09			12 hours	10000000	53	68	50	57	5700000000	6.92222e+09
	1000000	91	127	130	116	1160000000				1000000	118	102	99	106.333	1.06333e+09					10000000	67	86	70	74.3333	7.43333e+09
	1000000	114	134	108	118.667	1.18667e+09				1000000	120	130	117	122.333	1.22333e+09					10000000	78	74	77	76.3333	7.63333e+09
12 hours	10000000	101	133	147	127	12700000000	1.25667e+10		12 hours	10000000	130	155	159	148	14800000000	1.62556e+10			16 hours	10000000	100	109	115	108	10800000000	1.02889e+10
	10000000	120	126	127	124.333	1.24333e+10				10000000	157	160	167	161.333	1.61333e+10					10000000	93	107	116	105.333	1.05333e+10
	10000000	135	129	113	125.667	1.25667e+10				10000000	171	180	184	178.333	1.78333e+10					10000000	98	108	80	95.3333	9.53333e+09
16 hours	10000000	141	161	173	158.333	1.58333e+10	1.76556e+10		16 hours	100000000	50	68	68	62	62000000000	6.26667e+10			20 hours	100000000	32	37	39	36	36000000000	4.05556e+10
	10000000	166	181	193	180	18000000000				100000000	77	71	65	71	71000000000					100000000	45	50	42	45.6667	4.56667e+10
	10000000	200	190	184	191.333	1.91333e+10				100000000	56	49	60	55	55000000000					100000000	30	41	49	40	40000000000
20 hours	10000000	137	140	168	148.333	1.48333e+10	1.68778e+10		20 hours	100000000	89	81	87	85.6667	8.56667e+10	7.98889e+10			24 hours	100000000	77	62	68	69	69000000000	7.81111e+10
	10000000	168	180	191	179.667	1.79667e+10				100000000	90	80	67	79	79000000000					100000000	88	73	75	78.6667	7.86667e+10
	10000000	154	171	210	178.333	1.78333e+10				100000000	38	99	88	75	75000000000					100000000	93	87	80	86.6667	8.66667e+10
24 hours	10000000	150	148	119	139	13900000000	1.58778e+10		24 hours	100000000	98	94	80	90.6667	9.06667e+10	83000000000
	10000000	163	171	169	167.667	1.67667e+10				100000000	33	87	84	68	68000000000
	10000000	177	162	170	169.667	1.69667e+10				100000000	94	86	91	90.3333	9.03333e+10
RAW data scan
Triplicate 1
Triplicate 2
Triplicate 3
[truncated: 10 more columns]
